# Supplementary material
Source: PubMed Central journal article supplement (PMC5881387)

**Figure S1**

**A.**

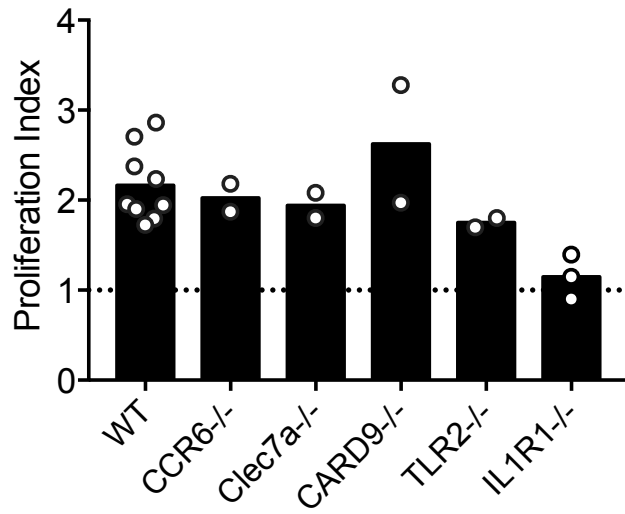

**B.**

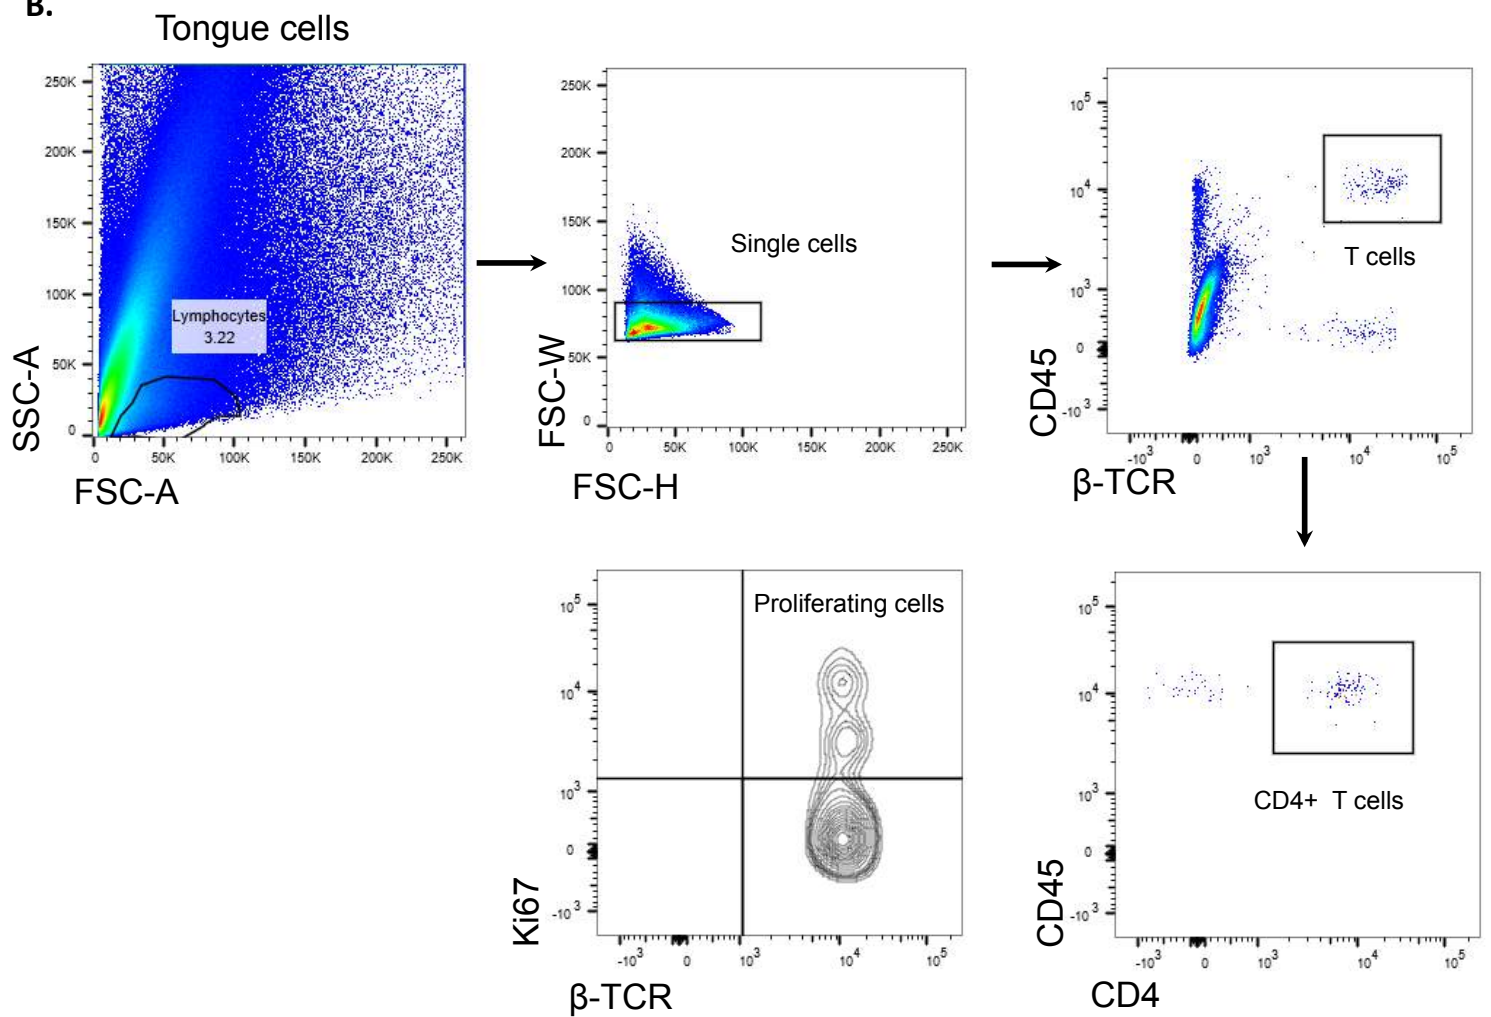

**Figure S2**

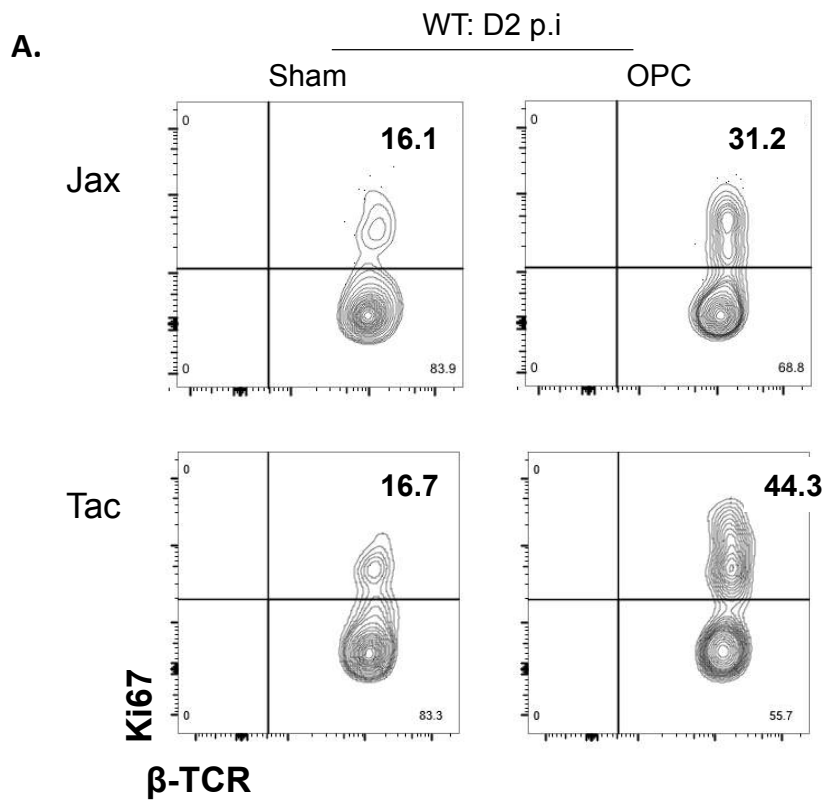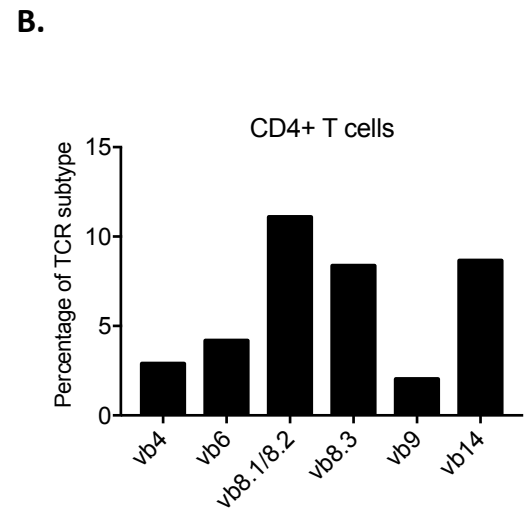

**Figure S3**

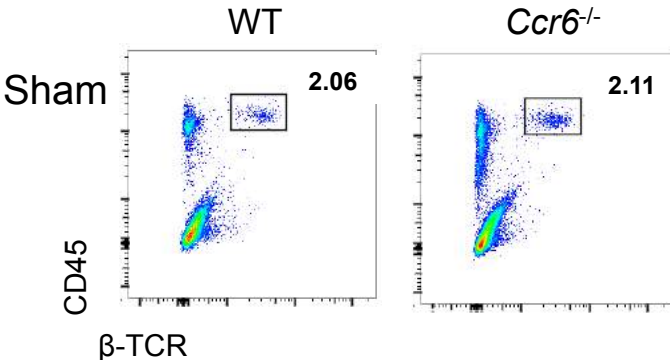

**Figure S4**

**A.**

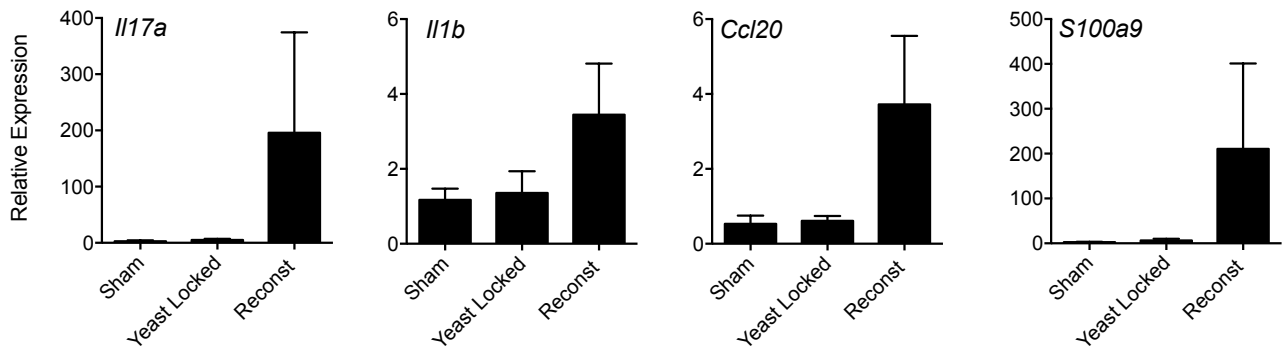

**B.**

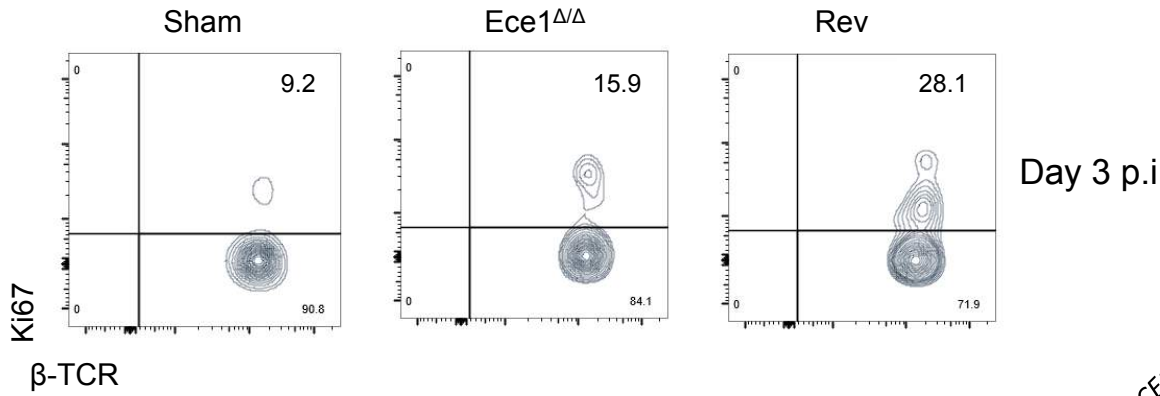

**C.**

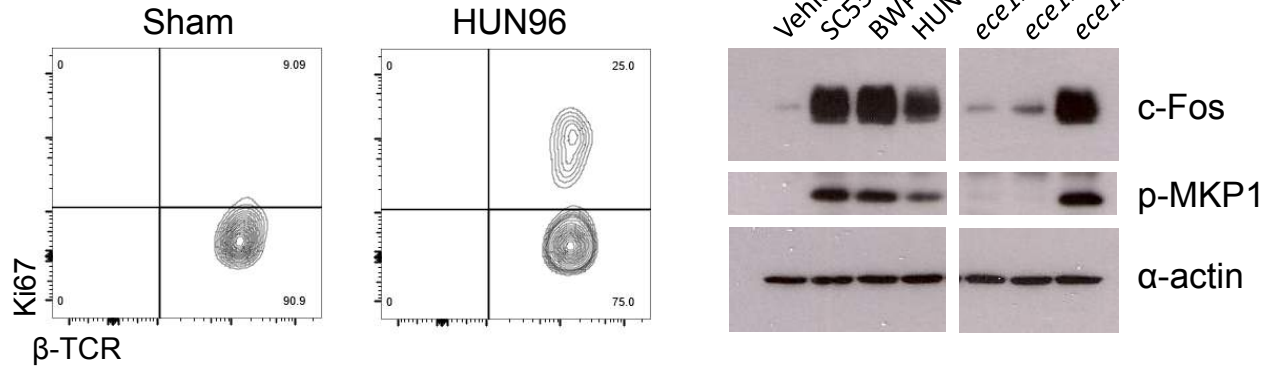

**D.**

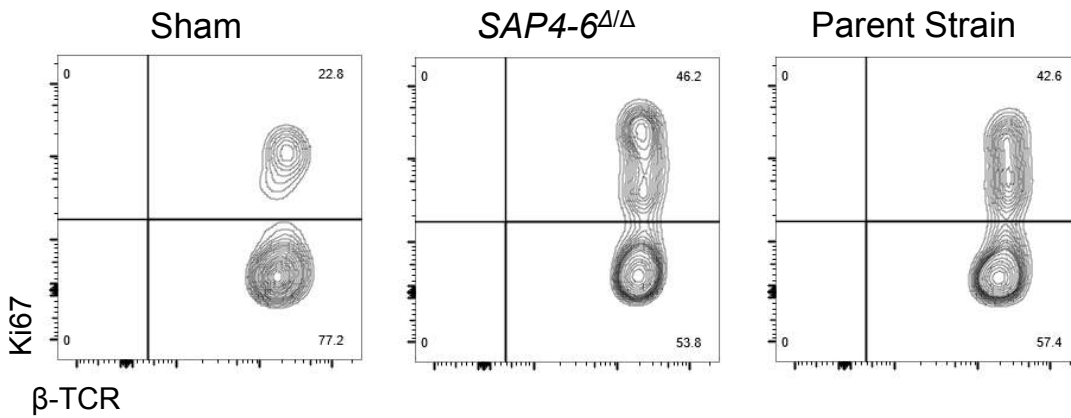

**Figure S5**

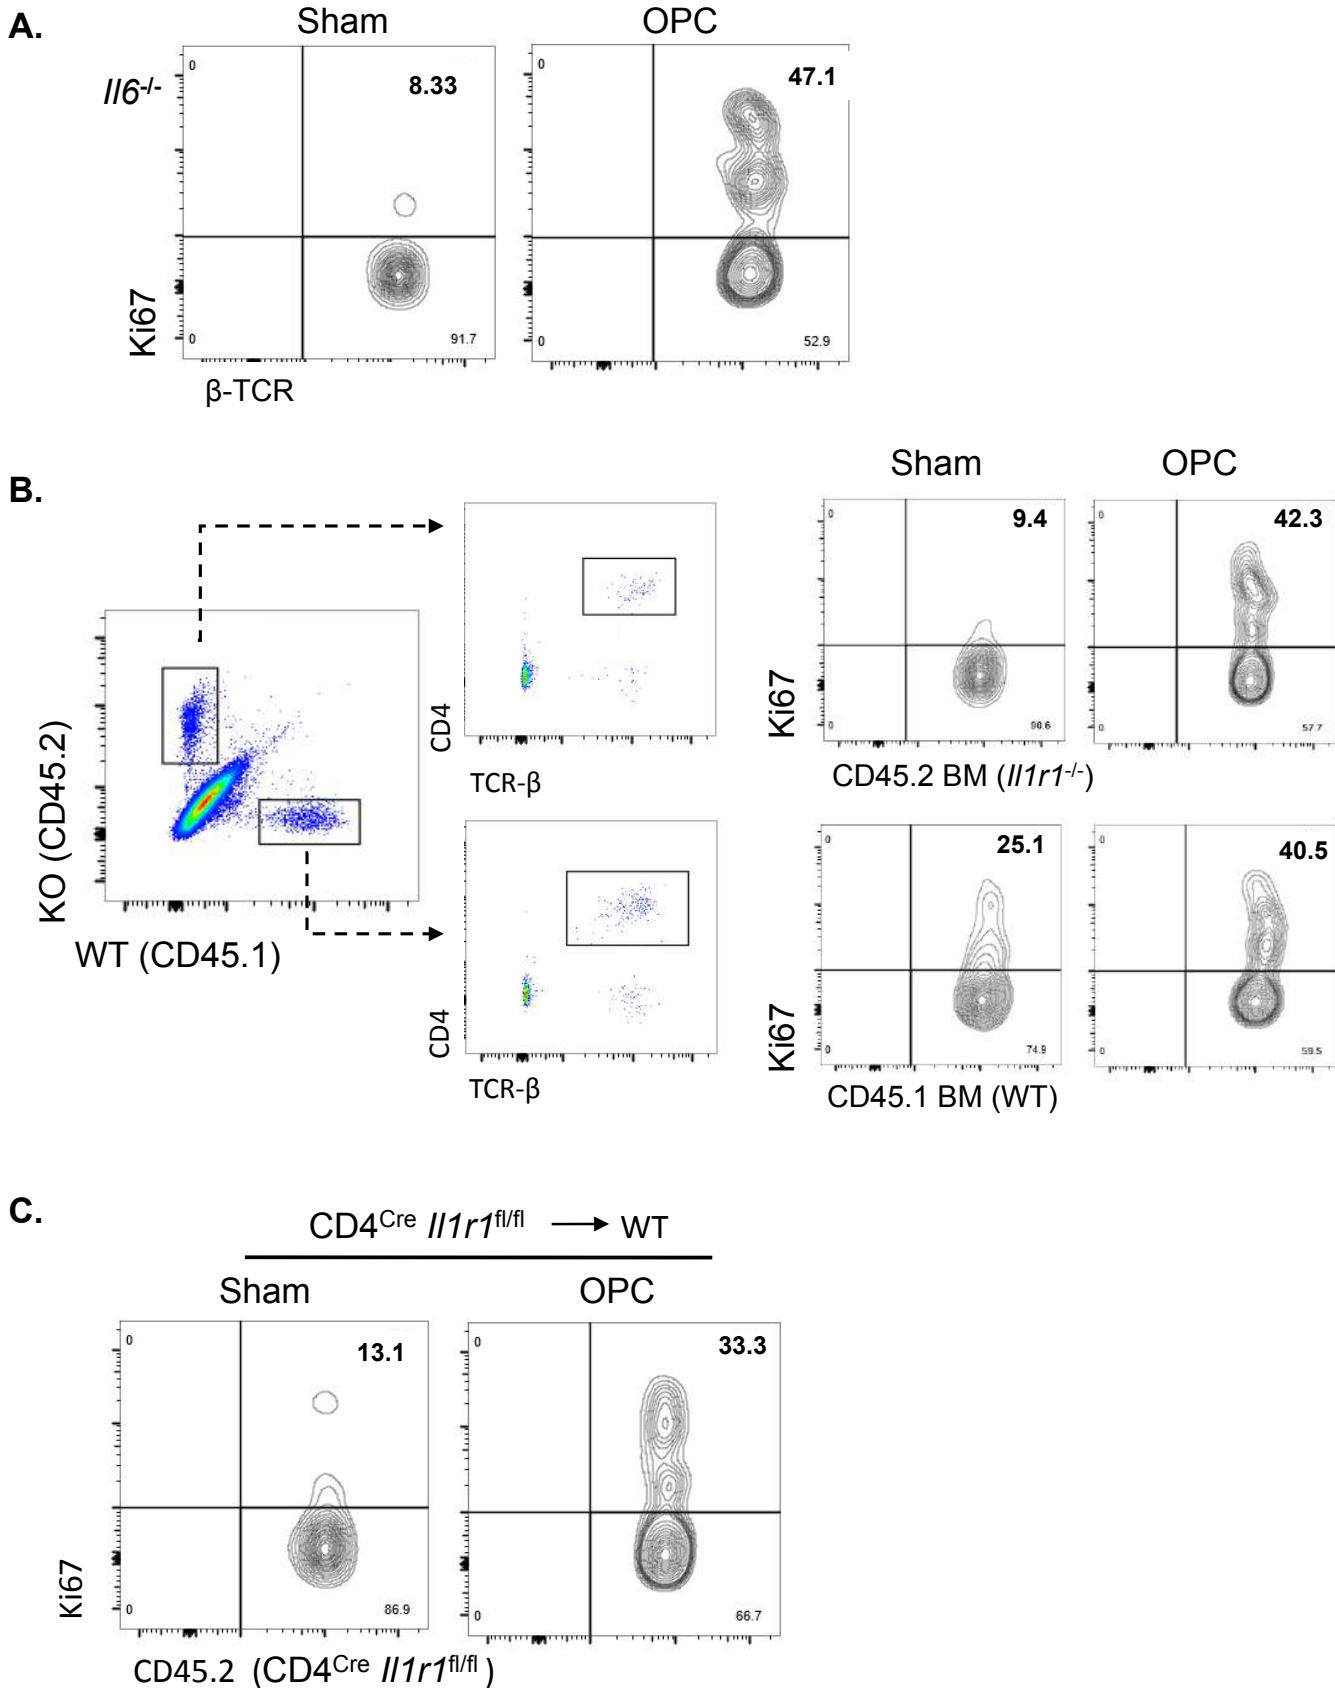

**Figure S6**

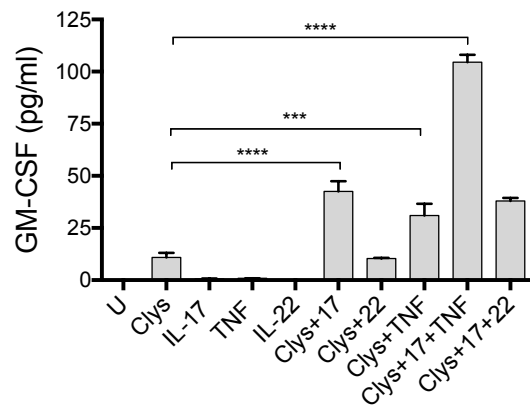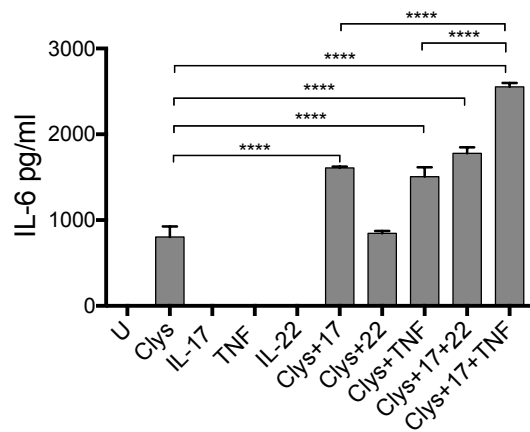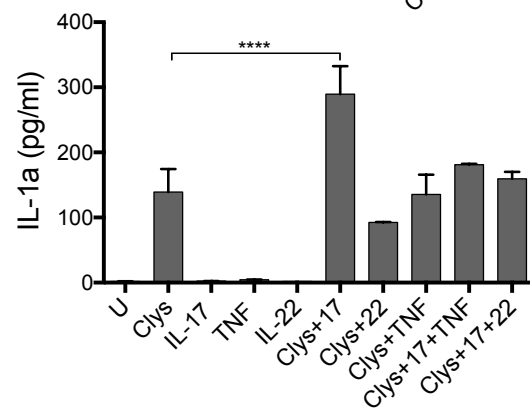

Figure S7

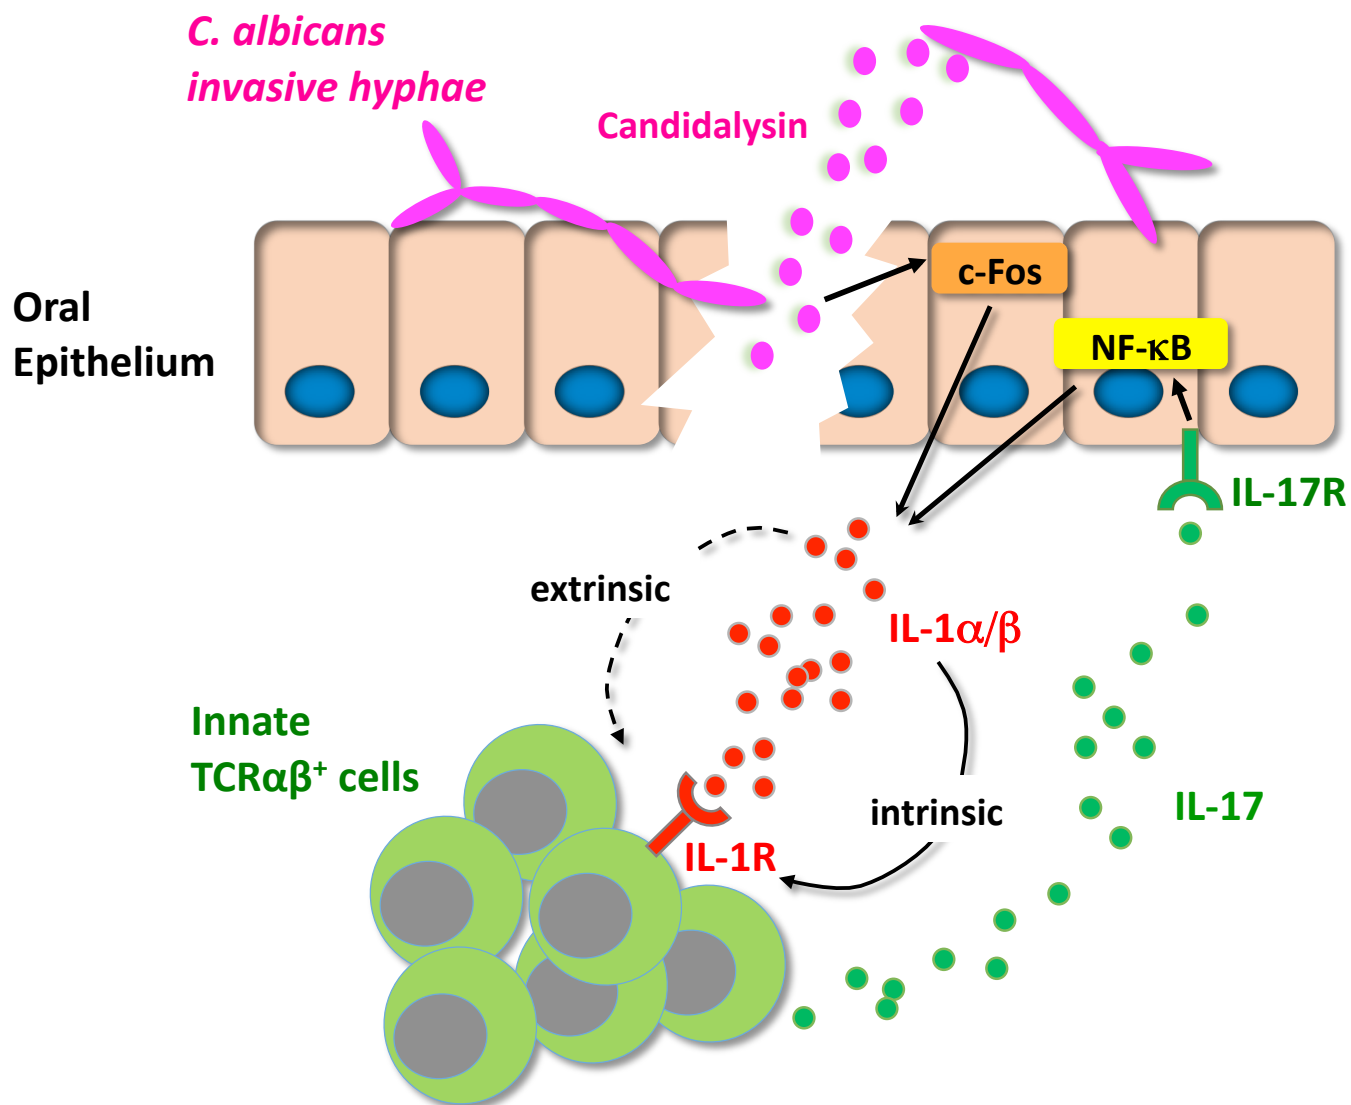

Supplement: NIHMS950013-supplement-supplement_1.pdf [file NIHMS950013-supplement-supplement_1.pdf]
